# Supplementary material
Source: publisher figshare collection journal article supplement (https://tandf.figshare.com/ndownloader/files/22664972)
Supplement: Supplementary file 1 [file 22664972]

**Supplementary Materials**

**
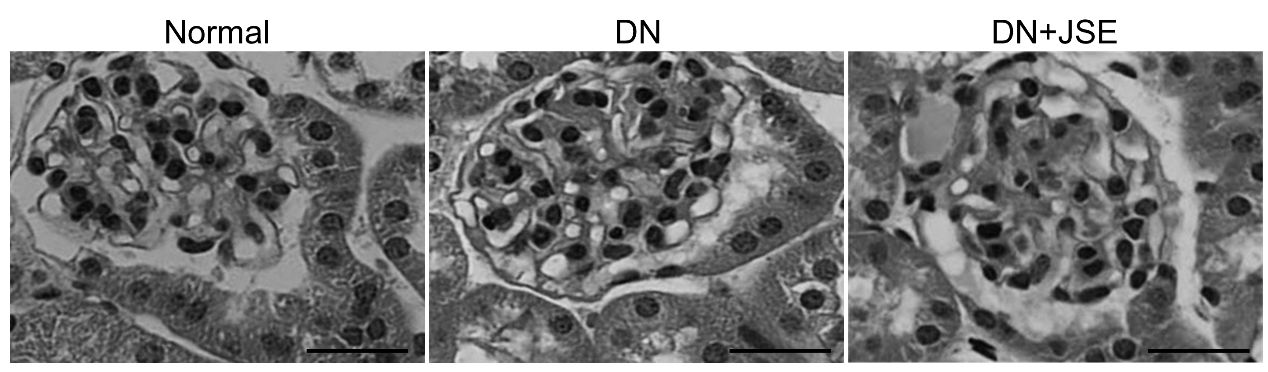
Figure S1. Histochemistry of kidney sections from diabetic mice.** Kidney sections were stained with hematoxylin and eosin (H&E) in control, DN, and DN mice fed with JSE. Section of normal group showed normal glomerular and tubular structure. Diabetic group showed an increased glomerular matrix. Treatment with JSE showed a decrease in glomerular matrix staining. Scale Bars represent 20 μm.
